# Supplementary material
Source: ML conference proceedings conference paper supplement (https://proceedings.mlr.press/v54/korba17a.html)
Supplement: Supplementary file [file KORBA17a-supp.pdf]

---

Supplementary material for  
A Learning Theory of Ranking Aggregation

---

## A Optimality

### A.0.1 Proof of Remark 6

Suppose  $P$  satisfies the *strongly stochastically transitive* condition. According to Theorem 5, there exists  $\sigma^* \in \mathfrak{S}_n$  satisfying (9) and (11). We already know that  $\sigma^*$  is a Kemeny consensus since it minimizes the loss with respect to the Kendall's  $\tau$  distance. Then, Copeland's method order the items by the number of their pairwise victories, which corresponds to sort them according to the mapping  $s^*$  and thus  $\sigma^*$  is a Copeland consensus. Finally, the Borda score for an item is:  $s(i) = \sum_{\sigma \in \mathfrak{S}_n} \sigma(i)P(\sigma)$ . Firstly observe that for any  $\sigma \in \mathfrak{S}_n$ ,

$$\sum_{k \neq i} \mathbb{I}\{\sigma(k) < \sigma(i)\} - \sum_{k \neq i} \mathbb{I}\{\sigma(k) > \sigma(i)\} = \sigma(i) - 1 - (n - \sigma(i)) = 2\sigma(i) - (n + 1). \quad (1)$$

According to (1), we have the following calculations:

$$\begin{aligned} s(i) &= \sum_{\sigma \in \mathfrak{S}_n} \frac{1}{2} \left( n + 1 + \sum_{k \neq i} (2\mathbb{I}\{\sigma(k) < \sigma(i)\} - 1) \right) P(\sigma) \\ &= \frac{n+1}{2} + \frac{1}{2} \left( \sum_{\sigma \in \mathfrak{S}_n} \sum_{k \neq i} 2\mathbb{I}\{\sigma(k) < \sigma(i)\} - (n-1) \right) P(\sigma) \\ &= \frac{n+1}{2} - \frac{n-1}{2} + \sum_{k \neq i} \sum_{\sigma \in \mathfrak{S}_n} \mathbb{I}\{\sigma(k) < \sigma(i)\} P(\sigma) \\ &= 1 + \sum_{k \neq i} p_{k,i}. \end{aligned}$$

Let  $i, j$  such that  $p_{i,j} > 1/2$  ( $\Leftrightarrow s^*(i) < s^*(j)$  under *stochastic transitivity*).

$$\begin{aligned} s(j) - s(i) &= \sum_{k \neq j} p_{k,j} - \sum_{k \neq i} p_{k,i} \\ &= \sum_{k \neq i,j} p_{k,j} - \sum_{k \neq i,j} p_{k,i} + p_{i,j} - p_{j,i} \\ &= \sum_{k \neq i,j} p_{k,j} - p_{k,i} + (2p_{i,j} - 1) \end{aligned}$$

With  $(2p_{i,j} - 1) > 0$ . Now we focus on the first term, and consider  $k \neq i, j$ .

(i) First case:  $p_{j,k} \geq 1/2$ . The strong stochastic transitivity condition implies that :

$$\begin{aligned}
p_{i,k} &\geq \max(p_{i,j}, p_{j,k}) \\
1 - p_{k,i} &\geq \max(p_{i,j}, p_{j,k}) \\
p_{k,j} - p_{k,i} &\geq p_{k,j} - 1 + \max(p_{i,j}, p_{j,k}) \\
p_{k,j} - p_{k,i} &\geq -p_{j,k} + \max(p_{i,j}, p_{j,k}) \\
p_{k,j} - p_{k,i} &\geq \max(p_{i,j} - p_{j,k}, 0) \\
p_{k,j} - p_{k,i} &\geq 0.
\end{aligned}$$

(ii) Second case:  $p_{k,j} > 1/2$ . If  $p_{k,i} \leq 1/2$ ,  $p_{k,j} - p_{k,i} > 0$ . Now if  $p_{k,i} > 1/2$ , having  $p_{i,j} > 1/2$ , the strong stochastic transitivity condition implies that  $p_{k,j} \geq \max(p_{k,i}, p_{i,j})$ .

Therefore in any case,  $\forall k \neq i, j$ ,  $p_{k,j} - p_{k,i} \geq 0$  and  $s(j) - s(i) > 0$ .

## B Empirical consensus

### B.1 Universal rates

We can obtain upper bounds using (16) and some calculations on  $L$  as follows. First notice that same as in (7) one has for any  $\sigma \in \mathfrak{S}_n$ :

$$\widehat{L}_N(\sigma) = \binom{n}{2} \mathbb{E} [\widehat{p}_{i,j} \mathbb{I}\{\sigma(\mathbf{i}) > \sigma(\mathbf{j})\} + (1 - \widehat{p}_{i,j}) \mathbb{I}\{\sigma(\mathbf{i}) < \sigma(\mathbf{j})\}]$$

so that

$$\begin{aligned}
|\widehat{L}_N(\sigma) - L(\sigma)| &= \binom{n}{2} |\mathbb{E} [(\widehat{p}_{i,j} - p_{i,j}) \mathbb{I}\{\sigma(\mathbf{i}) > \sigma(\mathbf{j})\} - (\widehat{p}_{i,j} - p_{i,j}) \mathbb{I}\{\sigma(\mathbf{i}) < \sigma(\mathbf{j})\}]| \\
&\leq \binom{n}{2} \mathbb{E}_{i,j} [|p_{i,j} - \widehat{p}_{i,j}|].
\end{aligned}$$

#### B.1.1 Proof of Proposition 9

(i) By the Cauchy-Schwartz inequality,

$$\mathbb{E}_{i,j} [|p_{i,j} - \widehat{p}_{i,j}|] \leq \sqrt{\mathbb{E}_{i,j} [(p_{i,j} - \widehat{p}_{i,j})^2]} = \sqrt{\text{Var}(\widehat{p}_{i,j})}.$$

Since  $\mathbb{E}_{i,j} [p_{i,j} - \widehat{p}_{i,j}] = 0$ . Then, for  $i < j$ ,  $N\widehat{p}_{i,j} \sim \mathcal{B}(N, p_{i,j})$  so  $\text{Var}(\widehat{p}_{i,j}) = \frac{p_{i,j}(1-p_{i,j})}{N} \leq \frac{1}{4N}$ . Finally, we can upper bound the expectation of the excess of risk as follows:

$$\mathbb{E} [L(\widehat{\sigma}_N) - L^*] \leq 2\mathbb{E} \left[ \max_{\sigma \in \mathfrak{S}_n} |\widehat{L}_N(\sigma) - L(\sigma)| \right] \leq 2 \binom{n}{2} \frac{1}{\sqrt{4N}} = \frac{n(n-1)}{2\sqrt{N}}.$$

(ii) By (16) one has for any  $t > 0$

$$\mathbb{P}\left\{L(\widehat{\sigma}_N) - L^* > t\right\} \leq \mathbb{P}\left\{2\binom{n}{2}\mathbb{E}_{\mathbf{i},\mathbf{j}}[|p_{\mathbf{i},\mathbf{j}} - \widehat{p}_{\mathbf{i},\mathbf{j}}|] > t\right\} = \mathbb{P}\left\{\sum_{1 \leq i < j \leq n} |p_{i,j} - \widehat{p}_{i,j}| > \frac{t}{2}\right\}, \quad (2)$$

and the other hand, it holds that

$$\mathbb{P}\left\{\sum_{1 \leq i < j \leq n} |p_{i,j} - \widehat{p}_{i,j}| > \frac{t}{2}\right\} \leq \mathbb{P}\left\{\bigcup_{1 \leq i < j \leq n} \left\{|p_{i,j} - \widehat{p}_{i,j}| > \frac{t}{2\binom{n}{2}}\right\}\right\} \leq \sum_{1 \leq i < j \leq n} \mathbb{P}\left\{|p_{i,j} - \widehat{p}_{i,j}| > \frac{t}{2\binom{n}{2}}\right\}. \quad (3)$$

Now, Hoeffding's inequality to  $\widehat{p}_{i,j} = (1/N)\sum_{t=1}^N \mathbb{I}\{\Sigma_t(i) < \Sigma_t(j)\}$  gives

$$\mathbb{P}\left\{|p_{i,j} - \widehat{p}_{i,j}| > \frac{t}{2\binom{n}{2}}\right\} \leq 2e^{-2N(t/2\binom{n}{2})^2}. \quad (4)$$

Therefore, combining (2), (3) and (4) we get

$$\mathbb{P}\left\{L(\widehat{\sigma}_N) - L^* > t\right\} \leq 2\binom{n}{2}e^{-\frac{Nt^2}{2\binom{n}{2}^2}}.$$

Setting  $\delta = 2\binom{n}{2}e^{-\frac{Nt^2}{2\binom{n}{2}^2}}$  one obtains that with probability greater than  $1 - \delta$ ,

$$L(\widehat{\sigma}_N) - L^* \leq \binom{n}{2}\sqrt{\frac{2\log(n(n-1)/\delta)}{N}}.$$

### B.1.2 Proof of Proposition 11

In the following proof, we follow Le Cam's method, see section 2.3 in Tsybakov (2009).

Consider two Mallows models  $P_{\theta_0}$  and  $P_{\theta_1}$  where  $\theta_k = (\sigma_k^*, \phi) \in \mathfrak{S}_n \times (0, 1)$  and  $\sigma_0^* \neq \sigma_1^*$ . We clearly have:

$$\begin{aligned} \mathcal{R}_N &\geq \inf_{\sigma_N} \max_{k=0,1} \mathbb{E}_{P_{\theta_k}} \left[ L_{P_{\theta_k}}(\sigma_N) - L_{P_{\theta_k}}^* \right] \\ &= \inf_{\sigma_N} \max_{k=0,1} \sum_{i < j} \mathbb{E}_{P_{\theta_k}} \left[ 2|p_{i,j} - \frac{1}{2}| \times \mathbb{I}\{(\sigma_N(i) - \sigma_N(j))(\sigma_k^*(i) - \sigma_k^*(j)) < 0\} \right] \\ &\geq \inf_{\sigma_N} \frac{|\phi - 1|}{(1 + \phi)} \max_{k=0,1} \sum_{i < j} \mathbb{E}_{P_{\theta_k}} [\mathbb{I}\{(\sigma_N(i) - \sigma_N(j))(\sigma_k^*(i) - \sigma_k^*(j)) < 0\}] \\ &\geq \frac{|\phi - 1|}{2} \inf_{\sigma_N} \max_{k=0,1} \mathbb{E}_{P_{\theta_k}} [d_\tau(\sigma_N, \sigma_k^*)], \end{aligned}$$

using the fact that  $|p_{i,j} - \frac{1}{2}| \geq \frac{|\phi - 1|}{2(1 + \phi)}$  (based on Corollary 3 from Busa-Fekete et al. (2014), see Remark 7). Set  $\Delta = d_\tau(\sigma_0^*, \sigma_1^*) \geq 1$ , and consider the test statistic related to  $\sigma_N$ :

$$\psi(\Sigma_1, \dots, \Sigma_N) = \mathbb{I}\{d_\tau(\sigma_N, \sigma_1^*) \leq d_\tau(\sigma_N, \sigma_0^*)\}.$$

If  $\psi = 1$ , by triangular inequality, we have:

$$\Delta \leq d_\tau(\sigma_N, \sigma_0^*) + d_\tau(\sigma_N, \sigma_1^*) \leq 2d_\tau(\sigma_N, \sigma_0^*).$$

Hence, we have

$$\mathbb{E}_{P_{\theta_0}} [d_\tau(\sigma_N, \sigma_0^*)] \geq \mathbb{E}_{P_{\theta_0}} [d_\tau(\sigma_N, \sigma_0^*) \mathbb{I}\{\psi = +1\}] \geq \frac{\Delta}{2} \mathbb{P}_{\theta_0}\{\psi = +1\}$$

and similarly

$$\mathbb{E}_{P_{\theta_1}} [d_\tau(\sigma_N, \sigma_1^*)] \geq \mathbb{E}_{P_{\theta_1}} [d_\tau(\sigma_N, \sigma_1^*) \mathbb{I}\{\psi = 0\}] \geq \frac{\Delta}{2} \mathbb{P}_{\theta_1}\{\psi = 0\}.$$

Bounding by below the maximum by the average, we have:

$$\begin{aligned} \inf_{\sigma_N} \max_{k=0,1} \mathbb{E}_{P_{\theta_k}} [d_\tau(\sigma_N, \sigma_k^*)] &\geq \inf_{\sigma_N} \frac{\Delta}{2} \frac{1}{2} \{\mathbb{P}_{\theta_1}\{\psi = 0\} + \mathbb{P}_{\theta_0}\{\psi = 1\}\} \\ &\geq \frac{\Delta}{4} \min_{k=0,1} \{\mathbb{P}_{\theta_1}\{\psi^* = 0\} + \mathbb{P}_{\theta_0}\{\psi^* = 1\}\}, \end{aligned}$$

where the last inequality follows from a standard Neyman-Pearson argument, denoting by

$$\psi^*(\Sigma_1, \dots, \Sigma_N) = \mathbb{I} \left\{ \prod_{i=1}^N \frac{P_{\theta_1}(\Sigma_i)}{P_{\theta_0}(\Sigma_i)} \geq 1 \right\}$$

the likelihood ratio test statistic. We deduce that

$$\mathcal{R}_N \geq \frac{\Delta|\phi-1|}{8} \sum_{\sigma_i \in \mathfrak{S}_N, 1 \leq i \leq N} \min \left\{ \prod_{i=1}^N P_{\theta_0}(\sigma_i), \prod_{i=1}^N P_{\theta_1}(\sigma_i) \right\},$$

and with Le Cam's inequality that:

$$\mathcal{R}_N \geq \frac{\Delta|\phi-1|}{16} e^{-NK(P_{\theta_0}||P_{\theta_1})},$$

where  $K(P_{\theta_0}||P_{\theta_1}) = \sum_{\sigma \in \mathfrak{S}_N} P_{\theta_0}(\sigma) \log(P_{\theta_0}(\sigma)/P_{\theta_1}(\sigma))$  denotes the Kullback-Leibler divergence. In order to establish a minimax lower bound of order  $1/\sqrt{N}$ , one should choose  $\theta_0 = (\phi_0, \sigma_0)$  and  $\theta_1 = (\phi_1, \sigma_1)$  so that, for  $k \in \{0, 1\}$ ,  $\phi_k \rightarrow 1$  and  $K(P_{\theta_0}||P_{\theta_1}) \rightarrow 0$  as  $N \rightarrow +\infty$  at appropriate rates.

We consider the special case where  $\phi_0 = \phi_1 = \phi$ , which results in  $Z_0 = Z_1 = Z$  for the normalization constant, and we fix  $\sigma_0 \in \mathfrak{S}_n$ . Let  $i < j$  such that  $\sigma_0(i) + 1 = \sigma_0(j)$ . We consider  $\sigma_1 = (i, j)\sigma_0$  the permutation where the adjacent pair  $(i, j)$  has been transposed, so that  $\sigma_1(i) = \sigma_1(j) + 1$  and  $\Delta = 1$ . For any  $\sigma \in \mathfrak{S}_n$ , notice that

$$d_\tau(\sigma_0, \sigma) - d_\tau(\sigma_1, \sigma) = \mathbb{I}\{(\sigma(i) > \sigma(j))\} - \mathbb{I}\{(\sigma(i) < \sigma(j))\} \quad (5)$$

According to (14), the Kullback-Leibler divergence is given by

$$K(P_{\theta_0}||P_{\theta_1}) = \sum_{\sigma \in \mathfrak{S}_n} P_{\theta_0}(\sigma) \log \left( \phi^{d_\tau(\sigma_0, \sigma) - d_\tau(\sigma_1, \sigma)} \right)$$

And combining it with (5) yields

$$K(P_{\theta_0}||P_{\theta_1}) = \log(\phi) \sum_{\sigma \in \mathfrak{S}_n} P_{\theta_0}(\sigma) (\mathbb{I}\{\sigma(i) > \sigma(j)\} - \mathbb{I}\{\sigma(i) < \sigma(j)\})$$

By denoting  $p_{j,i}^0 = P_{\theta_0}[\Sigma(i) < \Sigma(j)]$ , this gives us

$$K(P_{\theta_0}||P_{\theta_1}) = \log(\phi) (p_{j,i}^0 - p_{i,j}^0) = \log\left(\frac{1}{\phi}\right) (2p_{i,j}^0 - 1) = \log\left(\frac{1}{\phi}\right) \frac{1 - \phi}{1 + \phi} \quad (6)$$

Where the last equality comes from Busa-Fekete et al. (2014) (Corollary 3 for adjacent items in the central permutation, see also Remark 7).

By taking  $\phi = 1 - 1/\sqrt{N}$ , we firstly have  $|\phi - 1| = 1/\sqrt{N}$  and

$$K(P_{\theta_0}||P_{\theta_1}) = -\log(1 - 1/\sqrt{N}) \frac{1/\sqrt{N}}{2 - 1/\sqrt{N}}.$$

Then, since for all  $x < 1$ ,  $x \neq 0$ ,  $-\log(1-x) > x$  and for all  $N \geq 1$ ,  $2 - \frac{1}{\sqrt{N}} \geq 1$ , the Kullback-Leibler divergence can be upper bounded as follows:

$$K(P_{\theta_0}||P_{\theta_1}) \leq \frac{1}{\sqrt{N}} \cdot \frac{1}{\sqrt{N}} = \frac{1}{N}$$

and thus the exponential term  $e^{-NK(P_{\theta_0}||P_{\theta_1})}$  is lower bounded by  $e^{-1}$ . Finally:

$$\mathcal{R}_N \geq \frac{\Delta}{32} \min_{k=0,1} |\phi_k - 1| e^{-NK(P_{\theta_0}||P_{\theta_1})} \geq \frac{1}{16e\sqrt{N}}$$

## B.2 Fast Rates

### B.2.1 Proof of Proposition 14

Let  $\mathcal{A}_N = \bigcap_{i < j} \{(p_{i,j} - \frac{1}{2})(\widehat{p}_{i,j} - \frac{1}{2}) > 0\}$ . On the event  $\mathcal{A}_N$ ,  $p$  and  $\widehat{p}$  satisfy the strongly stochastic transitivity property, and agree on each pair, therefore  $\widehat{\sigma}_N = \sigma^*$  and  $L(\widehat{\sigma}_N) - L^* = 0$ . We can suppose without loss of generality that for any  $i < j$ ,  $\frac{1}{2} + h \leq p_{i,j} \leq 1$ , and we have  $N\widehat{p}_{i,j} \sim \mathcal{B}(N, p_{i,j})$ . We thus have:

$$\mathbb{P}\left\{\widehat{p}_{i,j} \leq \frac{1}{2}\right\} = \mathbb{P}\left\{N\widehat{p}_{i,j} \leq \frac{N}{2}\right\} = \sum_{k=0}^{\lfloor \frac{N}{2} \rfloor} \binom{N}{k} p_{i,j}^k (1 - p_{i,j})^{N-k} \quad (7)$$

As  $k \mapsto p_{i,j}^k (1 - p_{i,j})^{N-k}$  is an increasing function of  $k$  since  $p_{i,j} > \frac{1}{2}$ , we have

$$\sum_{k=0}^{\lfloor \frac{N}{2} \rfloor} \binom{N}{k} p_{i,j}^k (1 - p_{i,j})^{N-k} \leq \sum_{k=0}^{\lfloor \frac{N}{2} \rfloor} \binom{N}{k} \cdot p_{i,j}^{\frac{N}{2}} (1 - p_{i,j})^{\frac{N}{2}} \quad (8)$$

Then, since  $\sum_{k=0}^{\lfloor \frac{N}{2} \rfloor} \binom{N}{k} + \sum_{k=\lfloor \frac{N}{2} \rfloor}^N \binom{N}{k} = \sum_{k=0}^N \binom{N}{k} = 2^N$  and  $p_{i,j} \geq \frac{1}{2} + h$ , we obtain

$$\sum_{k=0}^{\frac{N}{2}} \binom{N}{k} \cdot p_{i,j}^{\frac{N}{2}} (1 - p_{i,j})^{\frac{N}{2}} \leq 2^{N-1} \cdot \left(\frac{1}{4} - h^2\right)^{\frac{N}{2}} = \frac{1}{2} (1 - 4h^2)^{\frac{N}{2}} = \frac{1}{2} e^{-\frac{N}{2} \log\left(\frac{1}{1-4h^2}\right)}, \quad (9)$$

Combining (7), (8) and (9), yields

$$\mathbb{P}\left\{\widehat{p}_{i,j} \leq \frac{1}{2}\right\} \leq \frac{1}{2} e^{-\frac{N}{2} \log\left(\frac{1}{1-4h^2}\right)} \quad (10)$$

Since the probability of the complementary of  $\mathcal{A}_N$  is

$$\mathbb{P}\left\{\mathcal{A}_N^c\right\} = \mathbb{P}\left\{\bigcup_{i < j} \{(p_{i,j} - \frac{1}{2})(\widehat{p}_{i,j} - \frac{1}{2}) < 0\}\right\} = \mathbb{P}\left\{\bigcup_{i < j} \{\widehat{p}_{i,j} \leq \frac{1}{2}\}\right\}, \quad (11)$$

combining (10) and Boole's inequality on (11) yields

$$\mathbb{P}\left\{\mathcal{A}_N^c\right\} \leq \sum_{i < j} \mathbb{P}\left\{\widehat{p}_{i,j} \leq \frac{1}{2}\right\} \leq \frac{n(n-1)}{4} e^{-\frac{N}{2} \log\left(\frac{1}{1-4h^2}\right)}. \quad (12)$$

As the expectation of the excess of risk can be written

$$\mathbb{E}\left\{L(\widehat{\sigma}_N) - L^*\right\} = \mathbb{E}\left\{(L(\widehat{\sigma}_N) - L^*)\mathbb{I}\{\mathcal{A}_N\} + (L(\widehat{\sigma}_N) - L^*)\mathbb{I}\{\mathcal{A}_N^c\}\right\},$$

using successively the fact that  $L(\widehat{\sigma}_N) - L^* = 0$  on  $\mathcal{A}_N$  and (12) we obtain finally

$$\mathbb{E}\left\{L(\widehat{\sigma}_N) - L^*\right\} \leq \frac{n(n-1)}{2} \mathbb{P}\left\{\mathcal{A}_N^c\right\} \leq \frac{n^2(n-1)^2}{8} e^{-\frac{N}{2} \log\left(\frac{1}{1-4h^2}\right)}.$$

### B.2.2 Remark 12

According to (12) and (20) we have

$$\mathbb{E}[(\widehat{L}^* - L^*)^2] = \mathbb{E}\left[\left(\sum_{i < j} \left\{\frac{1}{2} - \left|\widehat{p}_{i,j} - \frac{1}{2}\right|\right\} - \sum_{i < j} \left\{\frac{1}{2} - \left|p_{i,j} - \frac{1}{2}\right|\right\}\right)^2\right],$$

and pushing further the calculus gives

$$\mathbb{E}[(\widehat{L}^* - L^*)^2] = \mathbb{E}\left[\left(\sum_{i < j} \left|p_{i,j} - \frac{1}{2}\right| - \left|\widehat{p}_{i,j} - \frac{1}{2}\right|\right)^2\right] = \mathbb{E}\left[\left(\sum_{i < j} |p_{i,j} - \widehat{p}_{i,j}|\right)^2\right].$$

Firstly, with the bias-variance decomposition we obtain

$$\mathbb{E}[(\widehat{L}^* - L^*)^2] = \text{Var}\left(\sum_{i < j} |p_{i,j} - \widehat{p}_{i,j}|\right) + \left(\mathbb{E}\left[\sum_{i < j} |p_{i,j} - \widehat{p}_{i,j}|\right]\right)^2. \quad (13)$$

The bias in (13) can be written as

$$\mathbb{E} \left[ \sum_{i < j} |p_{i,j} - \widehat{p}_{i,j}| \right] = \sum_{\substack{i < j \\ p_{i,j} > \widehat{p}_{i,j}}} \mathbb{E} [p_{i,j} - \widehat{p}_{i,j}] + \sum_{\substack{i < j \\ p_{i,j} < \widehat{p}_{i,j}}} \mathbb{E} [\widehat{p}_{i,j} - p_{i,j}] = 0 \quad (14)$$

And the variance in (13) is

$$\text{Var} \left( \sum_{i < j} |p_{i,j} - \widehat{p}_{i,j}| \right) = \sum_{i < j} \sum_{i' < j'} \text{Cov}(|p_{i,j} - \widehat{p}_{i,j}|, |p_{i',j'} - \widehat{p}_{i',j'}|) \quad (15)$$

$$\leq \sum_{i < j} \sum_{i' < j'} \sqrt{\text{Var}(|p_{i,j} - \widehat{p}_{i,j}|) \text{Var}(|p_{i',j'} - \widehat{p}_{i',j'}|)}. \quad (16)$$

Since for  $i < j$ ,  $\widehat{p}_{i,j} \sim \mathcal{B}(N, p_{i,j})$ , we have

$$\text{Var}(|p_{i,j} - \widehat{p}_{i,j}|) \text{Var}(|p_{i',j'} - \widehat{p}_{i',j'}|) = \frac{p_{i,j}(1-p_{i,j})p_{i',j'}(1-p_{i',j'})}{N^2} \leq \frac{1}{16N^2}. \quad (17)$$

Therefore combining (17) with (15) gives

$$\text{Var} \left( \sum_{i < j} |p_{i,j} - \widehat{p}_{i,j}| \right) \leq \left( \frac{n(n-1)}{2} \right)^2 \frac{1}{4N}. \quad (18)$$

Finally according to (13), (14) and (18) we obtain:  $\mathbb{E}[(\widehat{L}^* - L^*)^2] \leq \frac{n^2(n-1)^2}{16N}$ .

### B.2.3 Proof of Proposition 15

Similarly to Proposition 11, we use Le Cam's method and consider two Mallows models  $P_{\theta_0}$  and  $P_{\theta_1}$  where  $\theta_k = (\sigma_k^*, \phi) \in \mathfrak{S}_n \times (0, 1)$  and  $\sigma_0^* \neq \sigma_1^*$ . We can lower bound the minimax risk as follows

$$\begin{aligned} \mathcal{R}_N &\geq \inf_{\sigma_N} \max_{k=0,1} \mathbb{E}_{P_{\theta_k}} \left[ L_{P_{\theta_k}}(\sigma_N) - L_{P_{\theta_k}}^* \right] \\ &= \inf_{\sigma_N} \max_{k=0,1} \sum_{i < j} \mathbb{E}_{P_{\theta_k}} \left[ 2|p_{i,j} - \frac{1}{2}| \times \mathbb{I}\{(\sigma_N(i) - \sigma_N(j))(\sigma^*(i) - \sigma_k^*(j)) < 0\} \right] \\ &\geq \inf_{\sigma_N} \max_{k=0,1} h \mathbb{E}_{P_{\theta_k}} [d_\tau(\sigma_N, \sigma^*)] \\ &\geq h \frac{\Delta}{4} e^{-NK(P_{\theta_0} \| P_{\theta_1})} \end{aligned}$$

With  $K(P_{\theta_0} \| P_{\theta_1}) = \log\left(\frac{1}{\phi}\right) \frac{1-\phi}{1+\phi}$  according to (6) and  $\Delta = 1$ , choosing  $\sigma_0$  and  $\sigma_1$  as in the proof of Proposition 11. Now we take  $\phi = \frac{1-2h}{1+2h}$  so that both  $P_{\theta_0}$  and  $P_{\theta_1}$  satisfy  $\mathbf{NA}(h)$ , and we have  $K(P_{\theta_0} \| P_{\theta_1}) = 2h \log\left(\frac{1+2h}{1-2h}\right)$ , which gives us finally:

$$\mathcal{R}_N \geq \frac{h}{4} e^{-N2h \log\left(\frac{1+2h}{1-2h}\right)}$$
